# Supplementary material
Source: PubMed Central journal article supplement (PMC6858865)
Supplement: EMS84899-supplement-Supplementary_content.pdf [file EMS84899-supplement-Supplementary_content.pdf]

Table S1: Current<sup>a</sup> clinical trials of empiric treatment of neonatal sepsis in developing countries.

| Study                                                                                                                 | Methods                                                      | Participants                                                                          | Intervention                                                                                                       | Outcomes                                                                           |
|-----------------------------------------------------------------------------------------------------------------------|--------------------------------------------------------------|---------------------------------------------------------------------------------------|--------------------------------------------------------------------------------------------------------------------|------------------------------------------------------------------------------------|
| <a href="#">Evaluation of community-based management of neonatal sepsis, Bangladesh</a>                               | Single blind, cluster randomised study                       | Neonates with danger signs of sepsis                                                  | Training of health workers on managing sepsis (amoxicillin and gentamicin), in addition to essential neonatal care | Coverage of intervention, provider performance, referral compliance                |
| <a href="#">Infant Severe Sepsis and Bacterial Meningitis in Malawi</a>                                               | Open label randomized trial                                  | Infants <2mo with severe sepsis or meningitis                                         | Ceftriaxone vs penicillin and gentamicin                                                                           | Recovery vs death or severe neurological sequelae                                  |
| <a href="#">Simplified Antibiotic Therapy for Sepsis in Young Infants, Karachi</a>                                    | Three-arm open label equivalence randomized controlled trial | Infants <60 days old with pSBI                                                        | Procaine penicillin+gentamicin, or amoxicillin+gentamicin, or procaine penicillin+gentamicin then amoxicillin      | Treatment failure within seven days of enrolment                                   |
| <a href="#">Simplified Antibiotic Regimens for Outpatient Treatment of Suspected Sepsis in Bangladesh</a>             | Three-arm open label randomized trial                        | Infants <60 days old with pSBI                                                        | Procaine penicillin+gentamicin, or amoxicillin+gentamicin, or penicillin+gentamicin then amoxicillin               | Treatment failure                                                                  |
| <a href="#">7 vs 10d Antibiotics for Neonatal Sepsis, India</a>                                                       | Open label randomized trial                                  | Neonates ≥32 weeks and ≥1,500g with culture-positive sepsis                           | 7d vs 10d of ceftriaxone, or amikacin, or vancomycin, or meropenem                                                 | Treatment failure                                                                  |
| <a href="#">Antibiotic Combinations for Infection in Newborn Babies, India</a>                                        | Randomized parallel group trial                              | Neonates 3-28d old with clinical and laboratory evidence of LONS                      | Cloxacillin+amikacin vs cefotaxime+gentamicin for 7-10d                                                            | Mortality, treatment failure, fungal infections, cost analysis                     |
| <a href="#">Short Course Treatment of Early Onset Neonatal Sepsis, Iran</a>                                           | Single-blind, randomized trial                               | Neonates >1,500g and/or >34 weeks with clinical sepsis within 7 postnatal days        | 3d vs 5d of ampicillin+amikacin                                                                                    | C-reactive protein level at end of treatment course, post-discharge cure rates     |
| <a href="#">Efficacy Study of Community-Based Treatment of Serious Bacterial Infections in Young Infants, Karachi</a> | Three-arm open label equivalence randomized controlled trial | Infants <60 days old with clinically-diagnosed pSBI                                   | Procaine penicillin+gentamicin, or ceftriaxone, or trimethoprim/sulfamethoxazole +gentamicin                       | Treatment success/cure rates, completion rates, adverse events, relapse rates      |
| <a href="#">Children's Antibiotic Resistant Infections in Low Income Countries, Madagascar</a>                        | Prospective cohort study                                     | Neonates with features of infection                                                   | Samples collected prior to initiation of empiric antibiotics                                                       | Bacterial aetiology of infections, incidence of infections with resistant bacteria |
| <a href="#">Zambia Chlorhexidine Application Trial</a>                                                                | Cluster-randomized controlled trial                          | Neonates born of women recruited during 2 <sup>nd</sup> or 3 <sup>rd</sup> trimesters | 4% chlorhexidine vs dry cord care                                                                                  | Neonatal mortality, omphalitis                                                     |
| <a href="#">Chlorhexidine Cordcare for Reduction in Neonatal Mortality and Omphalitis, Zanzibar</a>                   | Double-blind, community-based randomized controlled trial    | Neonates with first contact with health workers within 48h of delivery                | 4% chlorhexidine vs a control cord cleaning solution without chlorhexidine, then vs dry cord care                  | Neonatal mortality, omphalitis                                                     |
| <a href="#">Chlorhexidine Skin Application for Prevention of Infection, India</a>                                     | Double-blind, randomized controlled trial                    | Neonates weighing <1500g at birth                                                     | 0.25% chlorhexidine vs sterile water wipes                                                                         | Sepsis, readmission and mortality rates, skin colonization rates                   |
| <a href="#">Chlorhexidine Vaginal and Infant Wash in Pakistan</a>                                                     | Double-blind randomized controlled trial                     | Gravid women and their neonates                                                       | 0.6% chlorhexidine vaginal and infant wash vs sterile physiologic saline solution                                  | Neonatal death or sepsis, maternal infection or death                              |

<sup>a</sup> As of September 2014; assessed from <https://clinicaltrials.gov> and [www.who.int/ictrp/en/](http://www.who.int/ictrp/en/)
